# Supplementary material for: Strategies to optimize antimicrobial use and control antimicrobial resistance: an evidence- informed policy process
Source: Research Square preprint supplement (doi:10.21203/rs.3.rs-8165553/v1), 2025-12-03
Supplement: Supplementary file 1 [file c765b4abce0ef0314f7fc81e.docx]

**Additional file 1. Search strategies**

| **First search (August 2nd, 2021)** | |
| --- | --- |
| **Pubmed** | **Records** |
| ("antimicrobial stewardship"[MeSH Terms] OR "drug resistance, bacterial"[MeSH Terms] OR "bacterial resistance"[Title/Abstract] OR "antimicrobial resistance"[Title/Abstract] OR "antibiotic resistance"[Title/Abstract] OR "antimicrobial stewardship"[Title/Abstract] OR "antiretroviral stewardship"[Title/Abstract]) AND **("policy"[MeSH Terms] OR "polic*"[Title] OR "polit*"[Title] OR "guide*"[Title] OR "public health"[Title] OR "global health"[Title/Abstract] OR "one health"[Title/Abstract]**) AND "systematic review"[Filter] | **108** |
| **Bireme/Lilacs** | **Records** |
| ("antimicrobial stewardship") OR ("drug resistance, bacterial") AND (polic*) OR (polit*) AND ( db:("LILACS" OR "IBECS" OR "WHOLIS" OR "PAHOIRIS" OR "BBO" OR "BDENF" OR "BINACIS" OR "colecionaSUS" OR "CUMED" OR "LIPECS" OR "SES-SP" OR "MTYCI") AND type_of_study**:("guideline" OR "evaluation_studies" OR "policy_brief"**)) | **63** |
| **Scielo** | **Records** |
| ("antimicrobial stewardship") OR ("drug resistance, bacterial") AND (polic*) OR (polit*) | **57** |
| **Epistemonikos** | **Records** |
| (title:((title:("antimicrobial stewardship") OR abstract:("antimicrobial stewardship")) OR (title:("drug resistance, bacterial") OR abstract:("drug resistance, bacterial"))) OR abstract:((title:("antimicrobial stewardship") OR abstract:("antimicrobial stewardship")) OR (title:("drug resistance, bacterial") OR abstract:("drug resistance, bacterial")))) AND (title:(polic*) OR abstract:(polic*)) OR (title:(polit*) OR abstract:(polit*)) | **6** |
| **Aditional search (December 7th, 2021)** | **Records** |
| **Pubmed** | **Records** |
| (("antimicrobial stewardship"[MeSH Terms] OR "drug resistance, bacterial"[MeSH Terms] OR "bacterial resistance"[Title/Abstract] OR "antimicrobial resistance"[Title/Abstract] OR "antibiotic resistance"[Title/Abstract] OR "antimicrobial stewardship"[Title/Abstract] OR "antiretroviral stewardship"[Title/Abstract]) AND ("policy"[MeSH Terms] OR "polic*"[Title] OR "polit*"[Title] OR "guide*"[Title] OR "public health"[Title] OR "global health"[Title/Abstract] OR "one health"[Title/Abstract]) AND ("legislat*"[Title/Abstract] OR "law"[Title/Abstract] OR "regulat*"[Title/Abstract] OR "sell*"[Title/Abstract] OR "sales"[Title/Abstract] OR "drugstore"[Title/Abstract] OR "drug dispensers"[Title/Abstract] OR "purchasing"[Title/Abstract])) AND (review[Filter] OR systematicreview[Filter])  ("food"[Title/Abstract] OR "agricultur*"[Title/Abstract] OR "environment*"[Title/Abstract] OR "animal*"[Title/Abstract]) AND ("2016/12/07 00:00":"3000/01/01 05:00"[Date - Publication] AND ("review"[Publication Type] OR "systematic review"[Filter])) ("educat*"[Title] OR "communicat*"[Title]) AND ("review"[Publication Type] OR "systematic review"[Filter])) | **434** |
| **EBSCO** | **Records** |
| (Antimicrobial stewardship or antibiotic stewardship) AND (legislation or laws or regulation or policy or government) AND (review of literature or literature review or meta-analysis or systematic review) | **50** |
| **SCOPUS** | **Records** |
| (TITLE-ABS-KEY (“antimicrobial stewardship" ) AND TITLE-ABS-KEY ( education, communication, food, agriculture, regulation, law, drugstore) AND TITLE ( review ) ) AND ( LIMIT-TO ( DOCTYPE , "re" ) )  (Title: ("antimicrobial stewardship ") OR (Abstract: ("antimicrobial stewardship ") OR (Keyword: ("antimicrobial stewardship “) OR Field of Study: (“antimicrobial stewardship “) ) ) ) AND ( ( Title: ( education) OR ( Abstract: ( education ) OR ( Keyword: ( education ) OR Field of Study: ( education ) ) ) ) AND Title: review ) | **43** |

The databases were consulted between July and August 2021, and expanded searches were carried out for specific aspects in December 2021. Additionally, the following websites were consulted to consult guides, reports, or studies: WHO - FAO, CDC. Core Elements of Antibiotic Stewardship, NICE. Antimicrobial stewardship, UK. Antimicrobial Stewardship, Hub. Review on Antimicrobial Resistance, USA. The Joint Commission. Antimicrobial Stewardship, APIC. Association for Professionals in Infection Control and Epidemiology, Inc. ECDC -European Center for Disease Prevention and Control, Ireland. Health Service Executive, The Transatlantic Taskforce on Antimicrobial Resistance (TTFAR), Action on Antibiotic Resistance, OECD-Home Directorate for Employment, Labor and Social Affairs Health policies and data, PAHO. Antimicrobial Resistance, Public Health Agency of Canada, UK Department of Health and Social Care, Review on Antimicrobial Resistance UK, Antibiotic Research UK, Center for Disease Dynamics, Economics & Policy (CDDEP), Antibiotic Resistance Action Center (ARAC), ESCMID List of Antimicrobial Resistance Initiatives
