# Supplementary material for: Strategies to optimize antimicrobial use and control antimicrobial resistance: an evidence- informed policy process
Source: Research Square preprint supplement (doi:10.21203/rs.3.rs-8165553/v1), 2025-12-03
Supplement: Supplementary file 2 [file f10317da3f00b8385a2dc433.xlsx]

## Sheet: Evidence Option 1
Evidence-based reviews and other relevant records for Option 1. Strategies to strengthen regulatory activities that impact the control and mitigation of AMR
Type of review	Objective of the review	Key findings	Date of last search	AMSTAR 2	Proportion of studies conducted in Latin America	Proportion of studies addressing the topic of interest
Strategies to strengthen regulatory activities for the control and mitigation of AMR in human health: hospital settings
Systematic review	Summarize the literature on multiplex respiratory viral panels (MRVP) regarding the inappropriate use of antimicrobials (AM) and infection control measures (1).	Reduction in antibiotic therapy. Improved use of antivirals. Greater precision in infection control measures through the detection of unidentified pathogens or the suspension of isolation precautions when a negative MRVP result is obtained. The potential impact of MRVP on infection control measures is high due to the need for additional isolation precautions for many viral respiratory diseases.	August 2021	Critically low 4/12	0/25	25/25
Systematic review	Evaluate the published practices of Antimicrobial Stewardship Programs (ASP) in Middle Eastern countries (2).	ASPs demonstrated substantial improvements in patient outcomes, AM use, and antimicrobial resistance (AMR). They also reduced the number of hospitalizations and therapies. AM costs decreased by 28.45% and remained moderately stable in subsequent years.	September 30, 2020	Low 7/12	0/20	20/20
Scoping Review	Evaluate ASPs and infection prevention and control (IPC) programs aimed at controlling healthcare-associated Clostridioides difficile (CDI) and carbapenem-resistant Klebsiella pneumoniae (CRKP) infections (3).	Reduction of 6.58 to 310 DDDs/1000 patient-days in AM consumption. A 52% improvement in the rationalization of AM use. An 83% absolute risk reduction of CDI over 12 months. A 75% reduction in antibiotic consumption. A 97% reduction in CRKP risk over 36 months. A 55% reduction in other HAIs through staff education, isolation, environmental cleaning, and cases computerized alerts. An 84% reduction …	September 30, 2020	Low 9/10	0/54	54/54
Systematic review	Evaluate the effectiveness of pharmacist-led interventions in ASPs to improve AM use in hospitalized patients (4).	Pharmacist-led interventions reduced the duration of AM therapy without increasing mortality. However, evidence was inconsistent regarding reductions in hospital stay or infections by resistant microorganisms or Clostridium difficile.	July 2020	High 12/12	0/52	52/52
Systematic review with meta-analysis	Evaluate the effect of restricting the use of certain classes of antibiotics on the prevalence of resistant bacteria (5).	A 23% reduction in AMR among non-fermenting bacteria was observed after restricting fluoroquinolones (OR 0.77; 95% CI 0.62–0.97), and a 19% reduction after restricting piperacillin-tazobactam (OR 0.81; 95% CI 0.72–0.92). Combined ORs for carbapenem resistance in non-fermenting bacteria were 0.87 (95% CI 0.70–1.08). In ICU studies, carbapenem restriction significantly increased AMR [exp(β) 2.78; 9…	June 4, 2020	Critically low 12/16	1/15	15/15
Systematic review	Evaluate the effect of restricting the use of certain classes of antibiotics on the prevalence of resistant bacteria (6).	Implementation and adherence to antibiotic prescribing guidelines are effective in reducing antibiotic prescriptions. These strategies can serve as the core of an intervention or be integrated into broader programs with the same goal and should always be adapted to local capabilities and constraints. They may also contribute to cost reductions related to respiratory tract infections.	March 10, 2020	Moderate 11/12	3/34	34/34
Qualitative synthesis	Evaluate a research program within the One Health framework to understand AM use, drivers of AM prescribing, and interventions to improve it (7).	Clinical practice guidelines (CPGs) were rated as easily understandable and concise, facilitating the implementation of antimicrobial stewardship policies. However, barriers to implementation included insufficient supporting evidence for recommendation quality, inflexible guidelines, and lack of patience in the use of data. CPGs must be available, accessible, and user-friendly to reduce inappropr…	2020	N/A	0/16	16/16
Narrative review with expert consensus	Review the literature on best practices in antimicrobial stewardship (AMS) and discuss antifungal stewardship (AFS) from the perspective of the global core elements of AMS (8).	Expert review and feedback following prescriptions has been identified as the most effective intervention to improve antifungal prescribing and reduce antifungal use and associated costs. ASPs were associated with greater pharmacist-clinician interaction, increased identification of inappropriate AM use, and improved de-escalation practices. Additionally, empirical antifungal use decreased in hig…	2020	N/A	No information	No information
Evidence brief	Evaluate the challenges to AMR control in Romania and the best available interventions to address them from the human health sector (9).	IPC programs are cost-effective in high- and upper-middle-income countries. Hospital-based ASPs significantly reduce AM consumption and costs, with the greatest benefits observed in ICU. These programs are also associated with improved institutional AMR patterns, reductions in overall AM use (including in ICUs), and shorter hospital stays.	July 22, 2019	N/A	0/25	25/25
Systematic review with meta-analysis	Describe and evaluate ASP interventions and their impact on clinical and economic outcomes and antibiotic use in hospitalized patients in low- and middle-income countries (LMICs) (10).	Antibiotic restrictions and targeted antibiotic therapy upon admission significantly reduced antibiotic prescriptions and use by 14.8% (95% CI: 3.02 to 1.82; I²: 94.8%, p<0.001). Additionally, hospital stay duration decreased significantly by 19.1% (95% CI: 5.99 to 0.61; I²: 97.7%, p<0.001), and AM costs decreased by 2.4% (95% CI: 1.47 to 1.27; I²: 92.6%, p<0.001).	June 2019	Critically low 12/16	7/27	20/27
Scoping review	Map published data on ASPs implemented in public and private sector hospitals in South Africa, in line with the country's AMR strategy (11).	ASPs improve: 1) prescribing practices regarding dose, duration, appropriate drug choice, and spectrum reduction; 2) adherence to national and international treatment guidelines; 3) implementation of available AM susceptibility testing; 4) healthcare staff knowledge and training; 5) formation of multidisciplinary teams trained in daily clinical AMS practice; and 6) reduction in antibiotic use and…	March 31, 2019	Critically low 7/10	0/18	18/18
Systematic review	Evaluate the impact of AMS applications on antibiotic prescribing by attending physicians in hospitalized patients (12).	Decrease in average AM consumption. Following the implementation of AM guidelines, a significant reduction of USD 296,485 (p<0.05) in AM drug costs was achieved compared to the previous year.	February 28, 2019	Low 10/12	0/13	13/13
Systematic review	Synthesize evidence on the effectiveness and cost-effectiveness of behavior-change interventions targeting healthcare personnel to reduce inappropriate AM use in LMICs (13).	Educational, training, and restrictive/regulatory strategies were associated with reductions in AM prescribing. A 30% reduction was reported following the combined implementation of clinical practice guidelines (CPGs) and audit and feedback interventions; a decrease from 35.4% to 17.7% following training and monitoring at 6, 12, and 18 months. Educational seminars and didactic training strategies…	January 31, 2019	High 12/12	6/43	43/43
Scoping Review	Summarize evidence on the implementation and outcomes of pediatric ASPs worldwide (14).	Pediatric ASPs reduce costs by USD 370,069 annually by lowering drug administration (11.6% reduction in dispensed doses). Additionally, the MDRO isolation rate decreased from 104 to 79 per 1,000 patient episodes (−25%, p=0.01). Audit and feedback interventions reduced antibiotic costs by 62%.	November 21, 2018	Critically low 6/10	2/113	113/113
Systematic review	Determine the core components of an IPC program and its effectiveness to inform the development of evidence-based guidelines (15).	IPC programs are a key strategy for containing AMR and preventing the spread of HAIs. Significant positive effects were found for HAIs, CRBSI, SSI, CDI, CA-UTI, and infections due to MROs, as well for hand hygiene. Economic evaluations of multimodal interventions demonstrated greater cost savings and cost-effectiveness.	April 19, 2017	High 11/12	1/29	29/29
Systematic review	Identify evidence on the effectiveness of ASPs in general pediatric wards and pediatric ICUs (PICUs) to reduce AM consumption, use of broad-spectrum and restricted antibiotics, AMR, and HAIs (16).	In this context, ASPs reduce antibiotic consumption, HAIs, and AMR, although the evidence on antibiotic consumption and reducing restricted/broad-spectrum antibiotic use in PICUs is limited. There is a lack of data on the impact of ASPs on HAIs and AMR in PICUs. Urgent research on new antibiotics and classes to target critical MDRO pathogens is needed.	March 31, 2017	Low 11/12	0/9	9/9
Scoping review	Identify interventions to change antibiotic prescribing practices among prescribers and gatekeepers in LMICs (17).	CPGs are effective in hospital settings, whether implemented locally or as part of national programs. National guidelines such as CPGs reduced antibiotic consumption in China, indicating that guidelines can contribute to curbing antibiotic overuse.	2017	Critically low 5/10	5/102	102/102
Systematic review with meta-analysis	Determine the impact of ASPs on antibiotic consumption and clinical outcomes in patients in Asia (18).	ASPs reduced all-cause mortality in hospitalized patients compared to control groups (combined RR 0.88; 95% CI: 0.77–1.001; p=0.052) and reduced HAI rates (combined RR 0.66; 95% CI: 0.46–0.95; p=0.025; I²: 88.33%; p=0.001). A stratified meta-analysis showed a combined RR for studies with IPC or hand hygiene programs of 0.52 (95% CI: 0.36–0.77; p=0.001), and for studies without control, RR was 1.0…	June 20, 2016	Critically low 8/16	0/77	77/77
Systematic review with meta-analysis	Evaluate the effect of AMS on the incidence of infections and colonization by resistant bacteria (19).	ASPs combined with IPC measures had a greater effect on reducing AMR (31% decrease; incidence rate [IR] 0.69; 95% CI: 0.54–0.88; p=0.0030) compared to ASPs alone (19% decrease; IR 0.81; 95% CI: 0.67–0.97; p=0.0210). Hand hygiene combined with AMS was associated with a greater reduction in AMR incidence (66%; IR 0.34; 95% CI: 0.21–0.54; p<0.0001) than AMS alone (17%; IR 0.83; 95% CI: 0.71–0.98; p=…	May 31, 2016	High 15/16	2/76	76/76
Systematic review	Describe and critically evaluate studies that report on the cost and effectiveness of proposed interventions to control the emergence of AMR (20).	ASPs (including clinician, patient, or combined education, prescription feedback, and treatment protocols based on CPGs) increase rational prescribing and reduce AMR emergence. They reduce antibiotic prescribing in the intervention group (from 74% to 48%), increase the proportion of patients managed with non-pharmacological treatments (from 1% to 13.2%), and have a lower potential for inducing sp…	2000	Critically low 5/12	0/43	43/43
Strategies to strengthen regulatory activities aimed at controlling and mitigating AMR in human health: outpatient setting
Systematic review	Evaluate the published practices of ASP in Middle Eastern countries (2).	The support of information technologies is necessary to obtain accurate and timely information and to back clinical decision-making, enabling the effective identification of patients who require evaluation by interdisciplinary teams, the management, administration, and follow-up of interventions, and the promotion of initiatives within ASP teams.	September 30, 2020	Low 7/12	0/20	20/20
Systematic review	Determine the effect of educational programs on AMR control in the outpatient setting (21).	One study employed two intervention groups: 1) clinical decision support based on printed material (CDSP), and 2) clinical decision support system (CDSS), along with a control group. Antibiotic prescriptions in the context of acute cough illnesses decreased in the CDSP group from 80.0% to 68.3%, in the CDSS group from 74% to 60.7%, while in the control group they increased from 72.5% to 74.3%.	May 2020	Critically low 5/12	0/5	5/5
Systematic review with meta-analysis	Evaluate the effectiveness of ASPs in nursing homes on AM use, MDROs, prescribing practices, and resident mortality (22).	ASPs showed a combined reduction in inappropriate antibiotic use of 13.8% (95% CI: [4.7, 23.0]; I² = 99.9%), sustained for up to 30 months. A reduction in MRO isolation was observed. No differences were found in mortality between the control and intervention groups following the interventions.	February 27, 2020	Critically low 13/16	0/19	19/19
Qualitative synthesis	Evaluate a research program within the One Health framework to understand AM use, drivers of AM prescribing, and interventions to improve it (7).	The CDSS supported clinical decision-making by guiding appropriate antibiotic prescribing. Key factors such as accessibility, ease of use, content quality, and design and format improved daily use of the tool. Physicians reported satisfaction with the usability of the system.	2020	N/A	0/16	16/16
Scoping review	Provide an updated review of AMS initiatives in acute care settings (23).	The evaluated interventions included: 1) development and implementation of an assessment tool (template, algorithm, or decision-support tool), 2) educational component for providers, and 3) audit and feedback component. At least one positive change in AM use was found, either through reduced use of a specific drug or increased use of first-line therapy.	November 13, 2019	Critically low 7/10	0/4	4/4
Scoping review	Evaluate ASP initiatives in hospitals in Latin America and the Caribbean (LAC) (24).	Educational interventions were considered essential for prescriber autonomy, and when combined with locally adapted guidelines (and adherence to them), success was achieved in resource-limited settings. Only 14% of total ASP initiatives involved the use of information technology. Some of these interventions, such as electronic records and computerized prescribing systems, could enable monitoring …	October 2019	Low 7/10	147/147	147/147
Evidence brief	Evaluate the challenges to AMR control in Romania and the best available interventions to address them from the human health sector (9).	Outpatient ASPs improve AM prescribing without negatively affecting patient outcomes (strength of the evidence: low to moderate).	July 22, 2019	N/A	0/20	20/20
Scoping review	Summarize evidence on the implementation and outcomes of pediatric ASPs worldwide (14).	Pediatric ASPs reduce the isolation rate of MDROs and increase the rates of erythromycin-susceptible S. pyogenes following a reduction in macrolide use. ASPs reduce costs by decreasing the rates of AM management, although this may also be due to reduced rates of multidrug-resistant bacterial infections.	November 21, 2018	Critically low 6/10	2/113	113/113
Scoping review	Identify the components needed to inform a framework guiding AMS in general practice (25).	The strategies are related to decision support and include an analysis of the advantages and disadvantages of using decision-support tools that incorporate patient information resources, prescribing guidelines, and point-of-care or rapid diagnostic tests (e.g., C-reactive protein, influenza antigens, group A streptococcal antigen). Additionally, they emphasize the importance of access to proper, …	October 2018	Critically low 6/10	0/7	7/7
Systematic review	Evaluate implementation techniques applying behavioral science frameworks to ASP interventions in long-term care centers and their outcomes (26).	Interventions involving “enablement,” “environmental restructuring,” and “audit and feedback” strategies likely improve AMS. Strategies such as “behavioral self-monitoring,” “behavioral incentives,” and “behavioral goal setting for review” lacked sufficient evidence.	July 16, 2018	High 11/12	0/20	20/20
Narrative review	Describe AMS interventions for uncomplicated urinary tract infections (UTIs) in the outpatient setting (27).	Pharmacist review of urine cultures increased the number of antibiotics that were modified or discontinued (25%–65% of cases), reducing the number of days of prescribed antibiotics by 29%. Implementation of CDSS saved time for prescribers, reduced variability in healthcare by improving adherence to CPGs, and decreased the prescription of broad-spectrum antibiotics such as fluoroquinolones for unc…	2018	N/A	No information	No information
Scoping review	Identify interventions to change antibiotic prescribing practices among prescribers and gatekeepers in LMICs (17).	Successful interventions to reduce AM prescribing involved repeated feedback combined with supportive educational and follow-up strategies (face-to-face), showing effectiveness in hospitals and primary care centers. There is high-quality evidence that printed-based or electronic algorithms can improve and reduce AM prescribing.	2017	Critically low 5/10	5/102	102/102
Systematic review	Identify interventions to optimize AM prescribing and their effectiveness in dentistry (28).	ASPs reduced the number of antibiotic prescriptions in outpatient and primary dental care, as well as inappropriate antibiotic prescriptions (i.e., those not aligned with national or local guidelines).	June 20, 2016	High 11/12	0/9	9/9
Strategies to strengthen regulatory activities aimed at controlling and mitigating AMR from a “One Health” approach
Analysis of national action plans	Analyze National Action Plans (NAPs) from ten Association of Southeast Asian Nations (ASEAN) countries, explore their alignment with Global Action Plan objectives, and conduct a content analysis using an AMR governance framework (29).	IPC policies and guidelines in human and animal health were widely discussed in the NAPs. Only Singapore mentioned ongoing routine testing of drinking water. In animal health, good agricultural practices and biosecurity improvements were recommended to prevent disease. Environmental interventions were described by Cambodia, Indonesia, Laos, Myanmar, and Singapore, with examples including waste ma…	August 1, 2020	N/A	0/10	10/10
Narrative review and policy review	Describe predisposing factors and current conditions of AMR, along with the strengths and weaknesses of the Department of Livestock Services in controlling AMR in animal husbandry practices in Bangladesh (30).	The Government of Bangladesh enacted the “Fish Feed and Animal Feed Act, 2010” and the “Animal Feed Rule, 2013,” which prohibited the use of antibiotics in animal feed and restricted the use of colistin as a critically important antibiotic. These regulations empowered the Department of Livestock Services to designate competent personnel to enforce activities such as investigation, arrest, search …	June 2020	N/A	0/44	3/44
Narrative review	Provide an overview of the AMR problem in India from the One Health approach (31).	The Food Safety and Standards Authority of India (FSSAI) prohibited the use of certain AMs that could harm fisheries and those used in seafood processing. It also issued guidelines for the use of permitted AMs in seafood processing and in honey production.	2020	N/A	No information	No information
Qualitative synthesis	Evaluate a One Health–oriented research program to assess patterns of AM)use, the drivers of AM prescribing, and interventions to improve it (7).	In livestock production, there is still no clear and accurate understanding of the final use of AMs. A mixed-methods study on AM dosing through water in pig farms highlighted variations in how AM regimens are calculated, prepared, and administered, and identified knowledge gaps among farm managers. Centralizing AM use monitoring programs and the implementation of AM management activities within a…	2020	N/A	0/16	16/16
Narrative review and expert consensus	Formulate a set of actions through expert consensus to link AM use and AMR surveillance with AM stewardship/management activities in four different settings (32).	ASPs should be established in all settings where AMs are used, particularly for the treatment of food-producing animals and companion animals, with goals and interventions adapted to local circumstances and linked to local and national surveillance and infection control systems. ASPs must be defined, planned, implemented, and evaluated by a dedicated and competent team. This team should be adapte…	October 2019	N/A	0/45	45/45
Scoping review	Synthesize current evidence on AM use and strategies to combat AMR, including existing and emerging policies and practices in Bangladesh (33).	In 2007, the Ministry of Fisheries and Livestock formulated the National Livestock Development Policy, which highlighted inadequate veterinary services and weak enforcement of regulatory frameworks as barriers to addressing AMR in this sector. In 2010, specific laws were developed covering various aspects of animal and fish feed, prohibiting the use of AMs, growth hormones, and pesticides. Violat…	August 2019	Moderate 6/10	0/47	47/47
Narrative review	Describe the AM supply chain in cattle farming and its relation to policy choices for reducing use, and how five policy instruments could reduce AM use (34).	The characteristics of policy instruments that could reduce AM use in livestock production include: (1) regulations, such as setting thresholds for AM use or restricting certain AMs, which have the advantage of establishing clear targets and achieving rapid reductions; (2) economic incentives, such as increasing the cost of AM treatment through taxation or promoting alternative therapeutic practi…	July 2019	N/A	No information	No information
Rapid synthesis	Examine psychological behaviors associated with AM use and attitudes towards AMR among the general public, livestock farmers, and animal owners (35).	Knowledge of the appropriate use of AMs—including their ineffectiveness against viruses—and of the causes of AMR is very limited among the general population, particularly among low-income and less-educated groups. Awareness of AMR among farmers is also low, especially in developing countries. When deciding on the use of AMs in animals, farmers are more influenced by social norms (including the o…	2019	N/A	2/16	16/16
Document for the development and analysis of NAPs	Develop the first governance framework to guide the development and evaluation of NAPs for AMR control (36).	A governance framework was developed to support policymakers in designing, implementing, monitoring, and evaluating NAPs for AMR control within the One Health spectrum. It comprises 52 indicators, organized into 18 domains and grouped into three main governance areas: policy design, implementation tools, and monitoring and evaluation.	April 30, 2018	N/A	0/4	4/4
Narrative review y expert consensus	Identify relevant and guiding documents on AMR control and surveillance (37).	Following the literature review, an expert consensus approved 34 strategies to guide ASPs and AMR surveillance in healthcare settings. These strategies were distributed across nine categories related to leadership, accountability and antimicrobial management teams, institutional support, antimicrobial use, and monitoring and surveillance of AM use from a One Health perspective.	2018	N/A	0/51	51/51
Scoping review	Investigate the scope and characteristics of research activities aimed at improving antimicrobial (AM) stewardship among farmers and veterinarians involved in the health and welfare of food-producing animals (38).	The Danish Yellow Card system reduced AM prescribing in the swine sector. This system involved national surveillance of veterinary AM use and required farmers to reduce AM administration if a predefined threshold was exceeded. It demonstrated a 25% reduction in AM administration without negative impacts on animal health or mortality: pig mortality decreased by 1.1% (p = 0.03) after the interventi…	November 2017	Low 7/10	1/52	52/52
Strategies to strengthen compliance with existing regulations on over-the-counter sales and dispensing of AM
Systematic review with meta-analysis	Identify studies exploring non-biomedical factors influencing AM use by healthcare consumers globally to inform future interventions for improving practices in AM use (39).	The limited regulatory mechanisms for non-prescription sales of AMs are associated with a high prevalence of self-medication in low- and middle-income countries. Factors that increase the risk of self-medication include prior experience using antibiotics, the perception of long waiting times for medical care, easy access to AMs without a prescription, household storage of leftover prescriptions, …	July 30, 2020	Low 14/16	0/71	71/71
Narrative review	Provide an overview of the AMR problem in India from the One Health approach (31).	The Government of India gradually strengthened regulations to minimize over-the-counter sales of antibiotics and restricted the use of third generation and broad-spectrum antibiotics. In 2014, Schedule H1 was implemented to regulate the purchase of antibiotics.	2020	N/A	No information	No information
Scoping review	Synthesize current evidence on AM use and strategies to combat AMR, including existing and emerging policies and practices in Bangladesh (33).	A high prevalence of self-medication was found among patients, primarily for illnesses such as dysentery, diarrhea, and food poisoning (36%); cold, cough, and fever (28%); and suspected infections of various types (13%). The reasons behind this practice included advice from traditional healers (41%), prior experience with a specific antibiotic for a given illness (33%), knowledge about antibiotic…	August 2019	Moderate 6/10	0/47	47/47
Narrative review	Describe the AM supply chain in cattle farming and its relation to policy choices for reducing use, and how five policy instruments could reduce AM use (34).	In Europe, several countries (the Netherlands, Denmark, Sweden, and France) have implemented differentiated regulatory measures targeting specific types of antimicrobials (AMs) of clinical importance in human medicine, rapidly reducing their use without decreasing productivity in the agricultural sector. However, policies that target a very broad range of AMs will likely have negative effects on …	July 2019	N/A	No information	No information
Systematic review	Synthesize evidence on the effectiveness and cost-effectiveness of behavior-change interventions targeting healthcare personnel to reduce inappropriate AM use in LMICs (13).	The restriction on dispensing antibiotics without a medical prescription produced the following results: In Mexico, total antibiotic consumption decreased from 10.5 to 7.5 DDD/TID (29.2%), with a change in the consumption level of -1.17 DDD/TID. Only penicillins and sulfonamides showed significant changes: 0.86 DDD/TID and 0.17 DDD/TID, respectively. In Brazil, total AM use increased from 5.7 to …	January 31, 2019	High 12/12	6/43	43/43
Systematic review	Develop an evidence map identifying, describing, and evaluating government policy interventions aimed at reducing AM use in humans to support evidence-based AMR control actions (40).	The most common strategies were informational, such as public awareness campaigns, which informed healthcare workers or the general public about the excessive use of AMs, AMR, and guidelines for their appropriate use. The prohibition of over-the-counter sales of antibiotics was implemented in parts of Latin America in the late 1990s, and this measure is likely to have reduced excessive AM use. No…	January 28, 2019	Critically low 9/12	3/69	69/69
Analysis of national action plans	Analyze National Action Plans (NAPs) from ten Association of Southeast Asian Nations (ASEAN) countries, explore their alignment with Global Action Plan objectives, and conduct a content analysis using an AMR governance framework (29).	ASPs were mentioned by all countries except Vietnam. Most countries discussed ASPs in both human and animal health, with the exception of Cambodia and Malaysia, which focused exclusively on human health. Incentives or sanctions to reduce the inappropriate use of AMs were reported in Brunei, in human health in Singapore and the Philippines, and in animal health in Malaysia; however, no detailed pl…	August 1, 2020	N/A	0/10	10/10
Scoping review	Identify the components needed to inform a framework guiding AMS in general practice (25).	The WHO suggested including AMR in the national risk registry as “an effective mechanism for intergovernmental engagement.” Regulations on AM prescribing are critical components of antimicrobial management in the community. The accreditation or competency assessment of healthcare professionals for antibiotic prescribing was mentioned in two documents. Explicit policies and plans to regulate the u…	October 2018	Low 6/10	0/16	16/16
Scoping review	Identify interventions to change antibiotic prescribing practices among prescribers and gatekeepers in LMICs (17).	National policies that impose economic sanctions and business closures for selling antibiotics without a prescription have shown mixed results: they were effective in Mexico and in urban or private settings, but not in Brazil or in rural or public sectors. ASPs that employ multi-faceted approaches reduced antibiotic use and sales in both hospitals and pharmacies. Physicians who failed to comply w…	2018	Critically low 5/10	5/102	102/102
Strategies to strengthen regulatory activities for AMR control through monitoring, surveillance, and antimicrobial use regulation
Scoping review	Evaluate ASPs and infection prevention and control (IPC) programs aimed at controlling healthcare-associated Clostridioides difficile (CDI) and carbapenem-resistant Klebsiella pneumoniae (CRKP) infections (3)	Interventions for the management of CDI within ASP programs reduced AM use. Of this reduction, 11% was attributed to prescriber audit and feedback interventions, while 79% resulted from restrictive AM use policies and educational initiatives. AM costs were reduced by 54% through a monthly 30-minute educational intervention combined with an audit of prescribed AMs using a checklist. Rationalizatio…	September 30, 2020	Low 9/10	0/54	54/54
Systematic review	Analyze the strategies implemented in Uganda to detect and combat AMR (41)	The establishment of the National One Health Platform (November 2016) emphasized the importance of multisectoral coordination in infectious disease control, particularly for emerging zoonotic diseases. Most studies focused on samples collected from patients in various healthcare facilities, primarily regional hospitals. Analysis of these studies revealed that results centered on resistance profil…	August 2020	Critically low 3/12	0/163	163/163
Systematic review of mixed methods with meta-analysis	Identify studies exploring non-biomedical factors influencing AM use by healthcare consumers globally to inform future interventions for improving practices in AM use (39).	The lack of oversight and regulation in pharmaceutical manufacturing, combined with a weak supply chain, has led to the use of substandard or falsified AMs. Future strategies to address AMR should incorporate an implementation science approach to complex community-based interventions that target the behavioral drivers of the intended population, adapted to local contexts.	July 30, 2020	Low 14/16	0/71	71/71
Narrative review y expert consensus	Review the literature on best practices in antimicrobial stewardship (AMS) and discuss antifungal stewardship (AFS) from the perspective of the global core elements of AMS (8).	Centers treating patients with invasive fungal diseases should establish or adapt local surveillance systems to support ASPs. This surveillance should include: (1) standardized case definitions; (2) clearly defined populations for continuous surveillance; (3) identification of cultured fungal pathogens, specifying species level whenever possible; (4) mechanisms for real-time reporting, analysis, …	2020	N/A	No information	No information
Synthesis of programs to combat AMR	Describe the current status of AMR in the Pacific Island Countries and Territories (PICT) (42).	Reliable and regular surveillance is the cornerstone of any AMR control program, as it enables the development of targeted policies based on local data. Many of these countries monitor their medicine stocks and movements using software such as mSupply, updated in real time by dispensing staff in clinics. These systems collect healthcare data that can be presented to consumers and policymakers and…	2020	N/A	No information	No information
Narrative review	Provide an overview of the AMR problem in India from the One Health approach (31).	The government gradually tightened regulations on the sale of antibiotics without prescription and restricted the use of third generation and broad-spectrum antibiotics. In 2014, Annex H1 was implemented to regulate the purchase of antibiotics. The Food Safety and Standards Authority of India (FSSAI) prohibited the use of certain AMs that could harm fisheries and those used in seafood processing.…	2020	N/A	No information	No information
Qualitative synthesis	Evaluate a One Health–oriented research program to assess patterns of AM use, the drivers of AM prescribing, and interventions to improve it (7).	The CNGA is a research program within the One Health framework that monitors AM use and the implementation of AMS activities, facilitating information exchange between human and animal health and promoting synergistic approaches to research, education, and AMS implementation. The Australian National Antimicrobial Prescribing Survey (NAPS) is a complementary platform that supports AMS by providing…	2020	N/A	0/16	16/16
Analysis of the implementation of a surveillance strategy	Examine the progress, development, and implementation of an AMR surveillance strategy for human health in Uganda (43).	Sentinel sites with governance structures for AMR were established at national and regional levels through a laboratory diagnostic system that enables the monitoring of changes in AMR profiles as patients progress through the healthcare system. These information platforms were developed by the Ministry of Health, forming the African Laboratory Information System, which facilitates integration and…	2020	N/A	No information	No information
Analysis of governmental response	Examine legislative changes that have addressed AMR in both human and animal health (44).	Twenty legislative proposals related to AMR and human health were identified, but only three were enacted: (1) the Food and Drug Administration Safety and Innovation Act (2012), (2) the 21st Century Cures Act (2016), and (3) the Pandemic and All-Hazards Preparedness and Advancing Innovation Act (2019). Two of these laws focused on drug development by extending exclusivity periods and accelerating…	December 31, 2019	N/A	No information	No information
Analysis of a National Surveillance System	Characterize and map the AMR and AM use surveillance system using the One Health approach in the United Kingdom (45).	The most important intersectoral activity in the national surveillance system is the ResAlert contingency plan (2015), coordinated by the Directorate of Veterinary Medicines (DMV), which responds to the identification of an animal carrying a resistant bacterium considered a potential risk to human and/or animal health. Veterinary pharmaceutical companies have reported sales data to the DMV since …	December 2019	N/A	0/30	30/30 (Organizations)
Narrative review y expert consensus	Formulate a set of actions through expert consensus to link AM use and AMR surveillance with AM stewardship/management activities in four different settings (32).	If national monitoring of AM use is not feasible, a risk-based approach should be promoted to guide the monitoring of relevant antimicrobials and the most important animal species in a country or region. The selection of AM to be monitored should be informed by the WHO classification of critically important antimicrobials, the OIE list of veterinary antimicrobial agents of importance, and public …	October 2019	N/A	0/45	45/45
Scoping review	Synthesize current evidence on AM use and strategies to combat AMR, including existing and emerging policies and practices in Bangladesh (33).	In Bangladesh, there are policies, guidelines, ordinances, and laws aimed at containing AMR across the human, animal, and environmental sectors. Since the update of the National Drug Policy (2016), three documents with direct implications for AMR prevention and control in the human sector have been developed: (1) Pharmacovigilance and Adverse Drug Reactions (2017), which includes monitoring the s…	August 2019	Moderate 6/10	0/47	47/47
Systematic review	Summarize the characteristics of global antibiotic resistance surveillance systems (46).	Surveillance systems are heterogeneous, and a One Health approach is needed to monitor AMR in alignment with the WHO GAP. These systems are fundamental sources of data; however, they do not follow uniform rules for data collection or interpretation, which hinders comparability across systems. Most surveillance systems are in high-income countries and lack environmental data, likely because many a…	July 2019	Critically low 5/10	2/90	90/90
Systematic review	Synthesize evidence on the effectiveness and cost-effectiveness of behavior-change interventions targeting healthcare personnel to reduce inappropriate AM use in LMICs (13).	The most common interventions were educational and training-focused, with the latter proving more successful when combined with an educational, restrictive, or enabling component. Restrictive measures included the development and implementation of treatment guidelines, reforms to discourage the prescription of unnecessary and costly medicines, and restrictions limiting AB use to patients with a v…	January 31, 2019	High 12/12	7/43	43/43
Analysis of national action plans	Analyze National Action Plans (NAPs) from ten Association of Southeast Asian Nations (ASEAN) countries, explore their alignment with Global Action Plan objectives, and conduct a content analysis using an AMR governance framework (29).	Policies and guidelines on IPC in human and animal health were discussed in the NAPs. Only Singapore reported ongoing routine testing of drinking water. In animal health, good agricultural practices and biosecurity improvements were recommended to prevent disease. Food-related interventions were mentioned by Cambodia, Myanmar, the Philippines, and Singapore, including surveillance of foodborne pa…	2019	N/A	0/10	10/10
Scoping review	Summarize evidence on the implementation and outcomes of pediatric ASPs worldwide (14).	Pediatric ASPs were based on two main strategies: (1) prospective audit and feedback (conducted by a specialist to the prescriber); and (2) restriction through formularies and prior authorization requirements for specific AM. Guidelines for ASP implementation recommend the combined application of both strategies; however, only a small proportion of studies (3.5%) applied them jointly. In nearly a…	November 21, 2018	Critically low 6/10	2/113	113/113
Scoping review	Identify the components needed to inform a framework guiding AMS in general practice (25).	Regulations on AM prescription are critical components of AM management in the community. Policies and plans to regulate the use of new AMs require an approach that reduces misuse and restricts use to cases of clear clinical need. Monitoring of AM prescriptions and local AMR patterns was universally included in the guidelines, and several strategies were described to enhance their utility by link…	September 2018	Low 6/10	0/16	16/16
Narrative review y expert consensus	Identify relevant and guiding documents on AMR control and surveillance (37).	Following the literature review, an expert consensus approved 34 strategies to guide ASP and AMR surveillance in healthcare settings. These strategies were organized into nine categories addressing leadership, accountability, and AM management teams; institutional support; AM use; and monitoring and surveillance of AM use from a One Health perspective.	2018	N/A	0/51	51/51
Scoping review	Identify interventions to change antibiotic prescribing practices among prescribers and gatekeepers in LMICs (17).	Interventions to reduce AM prescribing involved repeated feedback combined with educational and monitoring strategies, demonstrating effectiveness in both hospitals and primary care centers. Audit/feedback and education/feedback interventions yielded positive results. Audit/feedback and AMS programs were implemented more frequently in hospitals than in other settings, reflecting the greater feasi…	2017	Critically low 5/10	5/102	102/102
Systematic review with meta-analysis	Determine the impact of ASPs on antibiotic consumption and clinical outcomes in patients in Asia (18).	Almost all studies evaluating antibiotic consumption (20/22) or therapy duration (6/7) demonstrated that ASP in Asia are associated with reductions in AM use without worsening clinical outcomes (mortality and HAIs). ASP appear more effective when they incorporate surveillance/detection and AM use audits (alone or combined with other strategies), including interventions for drug control or monitor…	June 20, 2016	Critically low	0/77	77/77
Systematic review with meta-analysis	Evaluate the effect of AMS on the incidence of infections and colonization by resistant bacteria (19).	A positive effect on AMR reduction was observed when ASP included antibiotic cycling (51% decrease; RR 0.49; 95% CI 0.34–0.72; p = 0.0030), audits and feedback (34% decrease; RR 0.66; 95% CI 0.52–0.83; p = 0.0006), and antimicrobial restriction (23% decrease; RR 0.77; 95% CI 0.67–0.89; p = 0.0003). The effectiveness of interventions increased over time: AMR decreased by 10% between 1980–2000 (RR …	May 31, 2016	High 15/16	2/76	76/76
Systematic review	Describe and critically evaluate studies that report on the cost and effectiveness of proposed interventions to control the emergence of AMR (20).	ASP (including medical, patient, or combined education, prescription feedback, and treatment protocols based on CPGs) improve rational prescribing and reduce the emergence of AMR. Most restrictive policies have been described in hospital settings, where certain antimicrobials may be limited in use or subject to restrictions in hospital formularies. Although such policies can alter prescribing pra…	2000	Critically low 5/12	0/43	43/43

## Sheet: Evidence Option 2
Evidence-based reviews and other relevant studies for option 2. educational strategies for technicians, technologists, and professionals in human, animal, and environmental health to improve AMR control.
Type of review	Objective of the review	Key findings	Date of last search	AMSTAR 2	Proportion of studies conducted in Latin America	Proportion of studies addressing the topic of interest
Educational strategies to improve the use of AM within faculties across different sectors
Scoping review	Identify evidence on innovative teaching and assessment practices for AMS in doctoral pharmacy curricula (47).	Several pharmacy schools in the United Kingdom and the United States incorporated AMS teaching into their curricula The learning objectives were based on guidelines issued by the Infectious Diseases Society of America (IDSA) and the Society for Healthcare Epidemiology of America (SHEA). The most used teaching strategies were didactic lectures, followed by case studies. Other strategies included a…	February 2020	Moderate 6/10	0/7	7/7
Scoping review	Investigate the role of nursing in antimicrobial administration and examine best practices for the preparation, administration, and disposal of intravenous AM (48).	Basic education on AMS is highly valued by undergraduate nursing students. In response to recent evidence from the United Kingdom showing that only 66% of undergraduate nursing curricula incorporate such content, an international consensus panel, represented by experts from eight countries, collaborated to develop undergraduate nursing education competencies in AMS.	July 2019	Moderate 6/10	1/43	43/43
Systematic review	Evaluate the impact of AMS applications on antibiotic prescribing by attending physicians in hospitalized patients (12).	Smartphones can be used to enhance AMS knowledge among healthcare personnel, both in training and licensed, by providing timely access to AMS guidelines and recommendations. This, in turn, supports appropriate prescribing, increases susceptibility, and reduces costs. The application was considered easy to use (77.4%) and useful (71.0%). Fifty-nine users reported that the app improved their knowle…	February 28, 2019	Low 10/12	2/13	13/13
Scoping review	Explore the incorporation of AMS teaching in undergraduate medical education (49).	Three recommendations were highlighted: (1) incorporate AMS content into medical school curricula, (2) assess the status and effectiveness of AMS curricular components in medical education, and (3) conduct research to evaluate the long-term outcomes of AMS training in medical education. Two quasi-experimental studies evaluated the impact of educational programs on AMS, finding improvements in stu…	August 2017	Critically low 5/10	0/6	6/6
Systematic review	Review the literature on AMS training in medical education (undergraduate and postgraduate) and determine the most effective interventions (50)	Educational approaches and strategies at in undergraduate curricula for AMS included web-based didactic teaching, clinical case discussions, workshops/seminars, board games, promotion of guidelines, audits of current integration of stewardship into the medical curriculum. For residents, strategies employed included web tutorials, workshops, assigned readings and informed sessions, restricted anti…	December 16, 2016	Critically low 5/12	1/48	48/48
Educational strategies to improve the use of AM and control ADR through continuing education across different sectors
Scoping review	Evaluate ASPs and infection prevention and control (IPC) programs aimed at controlling healthcare-associated Clostridioides difficile (CDI) and carbapenem-resistant Klebsiella pneumoniae (CRKP) infections (3).	The greatest reduction in prescribing (79%) was reported with interventions combining restrictive AM use policies and staff education (without distinguishing between the two). A three-month intervention in a neonatal unit in Hungary reported a reduction in hospital stay duration associated with a 29% increase in adherence to contact precautions, similar to findings from a six-year study that impl…	September 3, 2020	Moderate 9/10	0/54	54/54
Systematic review	Evaluate the effectiveness of pharmacist-led interventions in ASPs to improve AM use in hospitalized patients (4).	The following interventions were considered relevant: (1) educational outreach (review of individual patients and recommendations for therapy modification), (2) dissemination of educational materials through group meetings, (3) academic sessions, (4) audit and feedback, (5) reminders and preauthorization (approval by an expert), and (6) restriction of AM use through formulary controls. All studie…	July 2020	High 12/12	0/52	52/52
Systematic review	Determine the effect of educational programs on AMR control in the outpatient setting (21).	Various studies have reported educational and training strategies on AMR in the outpatient setting. The STAR Program (Stemming the Tide of Antibiotic Resistance) (Butler et al., 2012) implemented a practical seminar reflecting on antimicrobial prescribing practices and AMR data, combined with educational components and routine care consultation, which reduced the rate of oral AM prescriptions by …	May 2020	Critically low 5/12	0/5	5/5
Systematic review with meta-analysis	Evaluate the effectiveness of ASPs in nursing homes on AM use, MDROs, prescribing practices, and resident mortality (22).	The educational strategies reported in the studies included in-service training sessions, meetings, written support materials, and pocket cards for prescribers. Additional activities involved the use of AMS guidelines, follow-up visits, and feedback mechanisms to monitor interventions. These strategies were not evaluated separately. A reduction in inappropriate AM use was observed in 8 of 10 stud…	February 27, 2020	Moderate 13/16	0/19	19/19
Scoping review	Provide an updated review of AMS initiatives in acute care settings (23).	The interventions evaluated included the development and implementation of an assessment tool (template, algorithm, or decision-support tool), an educational component for providers, and an audit and feedback component. These interventions resulted in at least one significant positive change in antimicrobial (AM) use, such as a reduction in the use of a specific drug or an increased use of the pr…	November 13, 2019	Moderate 7/10	0/4	4/4
Review of mixed-methods studies	Synthesize current evidence on the role of nursing in AMS and its implications for policy development (51).	Educational sessions focused on patient safety and the collaborative, interprofessional nature of AMS significantly improved nurses’ confidence and knowledge regarding their willingness to question antibiotic orders (p < 0.001), the risk of catheter-related infections with intravenous (IV) antibiotics (p < 0.001), and IV-to-oral switch practices (p < 0.001). A reduction in the number of IV access…	November 2019	Low 6/12	1/52	52/52
Scoping review	Evaluate ASP initiatives in hospitals in Latin America and the Caribbean (LAC) (24).	Human resource allocation for AMS was initially considered a limitation in LAC. However, most publications reported having one or more staff members involved in AMS, although the specific types of professionals were not always identified. Educational interventions, adaptation of local guidelines, and adherence to them have proven successful in resource-limited settings. Restrictive interventions …	August 2019	Moderate 7/10	147/147	147/147
Scoping review	Investigate the role of nursing in AM administration and examine best practices for the preparation, administration, and disposal of intravenous AMs (48).	Evidence was found that AMS principles reduce the risk of patient harm and may decrease the incidence of AMR. One study reported a marked improvement in surgical prophylaxis with antimicrobials (26% vs. 100%, n = 100) following a nurse awareness campaign and the implementation of corrective measures, such as requiring surgeons to prescribe AM the night before surgery. In South Africa, the effecti…	July 2019	Low 6/10	1/43	4/43
Systematic review	Synthesize evidence on the effectiveness and cost-effectiveness of behavior-change interventions targeting healthcare personnel to reduce inappropriate AM use in LMICs (13).	Most interventions reported a positive impact: 27 improved antimicrobial (AM) prescribing (62.8%), while the remaining three led to improvements in antibiotic use and AM dispensing. Seven of eight education-based interventions demonstrated a positive effect. Most multi-component interventions (comprising two or more strategies) also had a positive impact on antibiotic use (76.6%). Three articles …	January 31, 2019	High 12/12	6/43	43/43
Analysis of national action plans	Analyze National Action Plans (NAPs) from ten Association of Southeast Asian Nations (ASEAN) countries, explore their alignment with Global Action Plan objectives, and conduct a content analysis using an AMR governance framework (29).	Certification or programs to ensure basic education on AM use and AMR for all involved professionals were widely discussed across all NAPs. Except for Thailand, all NAPs emphasized the inclusion of AMR and AMSin the curricula of health and veterinary professionals. Continuing education programs—including refresher training, workshops, and on-the-job conferences—aimed at expanding knowledge and su…	August 1, 2020	N/A	0/10	10/10
Systematic review with meta-analysis	Compare evidence on the effectiveness of digital education in AMS versus traditional education (52).	he findings suggest that the use of digital education, both online and through mobile devices, on AMS for healthcare professionals is associated with greater knowledge acquisition and reduced antimicrobial prescribing rates compared with traditional education in primary care settings. Certain types of mobile digital education strategies were also associated with lower costs relative to traditiona…	September 20, 2018	High 15/16	0/8	8/8
Systematic review	Conduct an inventory of interventions that may be considered part of ASPs (53).	This review presents an inventory of AMS tools freely available online, specifically designed for nursing homes. The findings highlight the complexity of implementing an ASP in these settings, while also demonstrating that the key elements of stewardship are applicable across all contexts. Central components include available expertise in infection management, educational and practical training, …	June 18, 2018	Critically low 6/12	0/36	36/36
Systematic review	Identify the effectiveness of AMS interventions in reducing inappropriate AM use in long-term care facilities (54).	Educating and training nurses and physicians on evidence-based management of infectious diseases can reduce inappropriate AM use in long-term care facilities for older adults. The likelihood of success increases when interventions target physicians, either alone or in combination with nurses. Findings included: a reduction of 11.1 prescriptions per 1,000 resident-days and 1.8 prescriptions avoide…	February 2018	Moderate 10/12	0/17	17/17
Systematic review with meta-analysis	Evaluate the effectiveness of ASPs that involve pharmacists in improving the quality of antimicrobial prescribing by general practitioners (55).	Interventions involving pharmacists included academic training, educational outreach visits, group meetings, CPGs, mailed education, educational sessions, delayed prescribing, workshop-based training, and prescription feedback. Educational strategies targeting general practitioners were effective, particularly when combined with feedback. Interventions implemented jointly by pharmacists and gener…	February 28, 2018	High 14/16	0/15	15/15
Systematic review	Evaluate the effectiveness of antimicrobial stewardship strategies in pediatric populations (56).	Studies focused on education reported improvements in AM prescribing, reflected in reduced consumption. The greatest improvement was observed with laminated cards containing prescribing guidelines, which increased appropriate AM prescribing for periorbital cellulitis (pre-intervention 19% vs. post-intervention 78%, p < 0.001) and community-acquired pneumonia (CAP) (pre-intervention 77% vs. post-i…	May 1, 2006	Critically low 5/12	1/28	28/28
Systematic review	Describe and critically evaluate the evidence on the cost and/or effectiveness of proposed interventions to control the emergence of AMR (20).	Educational strategies (targeting physicians, patients, or both), feedback, and the use of CPGs within ASP increase rational prescribing and reduce the emergence of AMR. The effectiveness of education programs for physicians and patients in U.S. primary care demonstrated a substantial reduction in antibiotic prescribing in the intervention group (from 74% to 48%). A RCT in Zambia examined the imp…	2000	Critically low 5/12	0/43	43/43

## Sheet: Evidence Option 3
Evidence-based reviews and other relevant records for Option 3. Community-based education and awareness strategies for AMR control.
Type of review	Objective of the review	Key findings	Date of last search	AMSTAR 2	Proportion of studies conducted in Latin America	Proportion of studies addressing the topic of interest
Strategies at the political authority level
Analysis of national action plans	Analyze National Action Plans (NAPs) from ten Association of Southeast Asian Nations (ASEAN) countries, explore their alignment with Global Action Plan objectives, and conduct a content analysis using an AMR governance framework (29).	Public awareness and education on AMR are essential to promote rational prescribing practices and reduce AM use. Public awareness campaigns and educational programs, including the World Antibiotic Awareness Week, were included in all NAPs. While many media campaigns had already been launched, only Indonesia and Myanmar reported plans for behavior change campaigns. Efforts to sustain these initiat…	August 1, 2020	N/A	0/10	10/10
Synthesis of programs to combat AMR	Describe the current status of AMR in the Pacific Island Countries and Territories (PICT) (42).	Community awareness campaigns can help reduce unnecessary demand for AMs, particularly in outpatient settings. Campaigns must be adapted to the local context; for example, in Samoa, the “Use (Antibiotics) with Love” campaign was launched in 2016. The effectiveness of such campaigns in these countries has not been formally evaluated. Priorities for addressing AMR should include sociological resear…	March 19, 2019	N/A	0/22	22/22
Systematic review	Develop an evidence map identifying, describing, and evaluating government policy interventions aimed at reducing AM use in humans to support evidence-based AMR control actions (40).	Communication policies targeting healthcare workers and the community were identified at different government levels: national, state/provincial, and local (municipal/county). Information strategies—including public awareness campaigns and the dissemination of information to healthcare workers and the general public about AMR and the excessive use of AMs—were the most common policies implemented …	January 28, 2019	Critically low 9/12	3/69	69/69
Rapid synthesis	Examine psychological behaviors associated with AM use and attitudes towards AMR among the general public, livestock farmers, and animal owners (35).	Face-to-face community education was more successful than media-based interventions, a difference attributed to people’s knowledge of and access to mass media. Interventions aimed at improving awareness of AMR and AM use among schoolchildren, parents, and the general public in high-income countries (United States, United Kingdom, Europe, and Oceania) demonstrated increases in knowledge, attitudes…	2019	N/A	2/16	16/16
Systematic review	Identify the components of communication interventions aimed at the general public to improve the use of AM that have been effective (57).	Mass media campaigns using slogans such as “Antibiotics are not automatic” (France), “Use antibiotics less often, but better”, and “Save antibiotics, they could save your life” (Belgium), disseminated through television, newspapers, and radio, reduced AM use in France by 26–30% and outpatient AM sales in Belgium by 6.5% in the first year of the campaign, although this effect was not sustained in …	July 16, 2015	Low 9/12	0/10	10/10
Strategies at the organizational level
Systematic review	Determine the effect of educational programs on AMR control in the outpatient setting (21).	The DECISION+ program, which consisted of a series of workshops and training interventions for family physicians on assessing the likelihood of bacterial versus viral respiratory infections and the associated benefits and risks, was evaluated in combination with strategies to improve physician–patient communication and promote patient involvement in AM use decisions. The percentage of patients wh…	May 2020	Critically low 5/12	0/5	5/5
Scoping review	To review existing educational interventions on AMR and the effectiveness of such campaigns in modifying and maintaining anti-AMR behaviors (58).	Multifaceted interventions are effective in achieving behavior change related to AMR, particularly in reducing AM prescribing, with the greatest impact observed when interventions also target healthcare personnel. Multifaceted campaigns raise public awareness of AMR, and education provided directly by healthcare professionals has a stronger influence on public awareness and behavior change. Such …	December 2019	Low 5/12	0/31	31/31
Systematic review	Synthesize evidence on the effectiveness and cost-effectiveness of behavior-change interventions targeting healthcare personnel to reduce inappropriate AM use in LMICs (13).	Visual aids used as tools to communicate prescribed medication instructions to patients demonstrated greater understanding of physicians’ directions and improved adherence to therapy compared with the control group. Most of the included articles evaluated interventions implemented in high- and middle-income countries, which may hinder the development of National Action Plans (NAPs) to address AMR…	January 31, 2019	High 12/12	7/43	43/43
Rapid synthesis	Examine psychological behaviors associated with AM use and attitudes towards AMR among the general public, livestock farmers, and animal owners (35).	Although marketing campaigns aimed at improving understanding and use of AMs have been conducted over the past 20 years, there is no strong evidence of their effectiveness. A NICE review found that educational interventions increased knowledge about the appropriate use of AMs but did not improve understanding of antimicrobial resistance (AMR). Educational interventions (e.g., posters and leaflets…	2019	N/A	2/16	16/16
Scoping review	Identify the components needed to inform a framework guiding AMS in general practice (25).	Thirteen documents described the need for public education campaigns to raise awareness about AMR and/or the unnecessary use of AMs as a central component of an AMS framework. Six articles highlighted the importance of general practitioners (GPs) (educating patients about the appropriate use of AMs during consultations, and nine articles emphasized the role of GPs in teaching patients how to mana…	October 2018	Low 6/10	0/7	7/7
Systematic review	Identify and evaluate studies on public campaigns or patient-directed messaging programs to raise awareness about appropriate AM use in the U.S. (59).	Educational interventions targeting the general population—including adults, parents, children, and students—were evaluated. Most interventions focused on parents of young children through printed messages delivered in healthcare settings (outpatient clinics or emergency departments). Although this review was limited to interventions directed at the general population, more than half also include…	February 16, 2016	Critically low 7/12	0/34	34/34
Systematic review	Identify the components of communication interventions aimed at the general public to improve the use of AM (57).	Community-level informational campaigns that used household materials and mailed interventions demonstrated a 24% reduction in antimicrobial (AM) prescribing at healthcare practice sites. Regional campaigns also showed positive results; for example, a study in private practices in Denver found that adding a public-directed intervention during medical care reduced AM prescribing rates for adults w…	July 16, 2015	Low 9/12	0/10	10/10
Systematic review	Describe and critically evaluate studies that report on the cost and effectiveness of proposed interventions to control the emergence of AMR (20).	The use of interventions such as education (targeting physicians, patients, or both), prescription feedback, and treatment protocols based on CPGs has been associated with increased rational prescribing and, consequently, a reduction in the emergence of AMR. The effectiveness of such programs was demonstrated in U.S. primary care, where education for physicians and patients resulted in a substant…	2000	Critically low 5/12	0/43	43/43

## Sheet: Evidence for implementation
Evidence-based reviews and other relevant records for implementation considerations: facilitators, barriers and implementation strategies
Type of review	Objective of the review	Key findings	Date of last search	AMSTAR 2	Proportion of studies conducted in Latin America	Proportion of studies addressing the topic of interest
Report	Report on the participation of livestock institutions in AMR control in Colombia (60).	Strategies: FEDEGAN, together with other Colombian companies, has actively promoted among livestock producers the responsible use of AMs in animal health and raised awareness of the economic impact of neglecting AMR in livestock production. Currently, it is part of the inter-guild alliance to promote the prudent use of AMs across different production systems.	2021	N/A	N/A	N/A
Systematic review of mixed methods with meta-analysis	Identify studies exploring non-biomedical factors influencing AM use by healthcare consumers globally to inform future interventions for improving practices in AM use (39).	Barriers: Limited access to healthcare, long waiting times, transportation difficulties (for consultations or collecting medications), financial constraints in paying for consultations, stigma associated with infections (as reported in countries such as Saudi Arabia), challenges linked to sick leave and work absences, and barriers in physician–patient communication all influenced individuals’ pra…	July 30, 2020	Moderate 14/16	0/71	71/71
Systematic review	Examine the barriers and facilitators of AMS in sub-Saharan Africa (SSA) (61)	Barriers: Five main themes were identified: 1) Ineffective regulation at the national or local level and behaviors that promote AMR. A balance is needed between stricter pharmacy regulation, reducing OTC sales of AMs, and maintaining access to medicines for rural communities. 2) Health system factors. Tensions exist between AMS and the profitability of pharmacies. In Burkina Faso, patients were t…	May 5, 2020	Low 9/12	0/14	14/14
Systematic review	To synthesize and evaluate the evidence on the implementation of ASPs in Gulf Cooperation Council (GCC) hospitals (62)	Regarding the implementation of ASP: Facilitators: medical and institutional support, information systems, and education. Barriers: Staff shortages, heavy workloads, and insufficient funding, as well as incomplete reporting, lack of governance, and limited national-level support. Strategies: (1) locally developed guidelines based on cultures and sensitivity testing; (2) ensuring proper follow-up …	January 2020	High 11/12	0/17	17/17
Analysis of the implementation of a surveillance strategy	Examine the progress, development, and implementation of an AMR surveillance strategy for human health in Uganda (43).	Barriers: (1) Lack of standardization in isolation testing for different priority microorganisms, (2) Limited awareness leading to underutilization of microbiology laboratories (lower demand), reduced supplies, and inadequate microbiology logistics, (3) Shortage of human resources for conducting microbiological susceptibility testing.	2020	N/A	No information	No information
Qualitative synthesis	Evaluate a One Health–oriented research program to assess patterns of AM use, the drivers of AM prescribing, and interventions to improve it (7).	Facilitators: (1) Telehealth models have been successful in strengthening AMS programs in rural and regional hospitals by facilitating access to expertise, local or network resources, and integration across acute, primary, geriatric, and veterinary care, (2) Linking surgical prophylaxis with patient outcomes and providing comparative evaluations, (3) Collaboration between general practitioners an…	2020	N/A	0/16	16/16
Systematic review	Synthesize current evidence on the role of nursing in AMS and its implications for policy development (51).	Barriers: The perception among some nurses that physicians are solely responsible for “reducing” antimicrobial (AM) prescribing was identified as a motivational barrier. Some prescribers perceived nursing influence as pressure to prescribe AMs. Nursing staff considered lack of time due to workload as a barrier to their participation in AMS programs, and some perceived AMS activities as lower prio…	November 2019	Critically low 6/12	1/52	52/52
Scoping review	Investigate the role of nursing in antimicrobial administration and examine best practices for the preparation, administration, and disposal of intravenous antimicrobials (48).	Barriers: A perceived challenge in implementing nursing roles in antimicrobial stewardship (AMS) is the difficulty of introducing new responsibilities for this group, given competing demands on time and resources.	July 2019	Low 6/10	1/43	4/43
Evidence brief	Evaluate the challenges to AMR control in Romania and the best available interventions to address them from the human health sector (9).	Facilitators: IPC programs are cost-effective in high- and upper-middle-income countries. Strategies: Hospital-based ASP programs significantly reduce both AM consumption and costs, with the greatest benefits observed in ICUs. These programs are associated with improved institutional resistance patterns, decreased overall AM use (including in ICUs), and shorter hospital stays.	July 22, 2019	N/A	0/25	25/25
Expert consensus	Describe and propose the characteristics, objectives and design of an adequate international policy on the use of antibiotics (63).	Barriers: The perception among some nurses that physicians are solely responsible for “reducing” AM prescribing was identified as a motivational barrier. Some prescribers perceived nursing influence as pressure to prescribe AMs. Nursing staff considered lack of time due to workload as a barrier to their participation in AMS programs, and some perceived AMS activities as lower priority compared to…	March 2019	N/A	No information	No information
Systematic review	Critically assess the gaps in reporting quality in AMR intervention research (64).	Barriers: Evaluations of government policies to reduce AM use assessed only about half of the key elements using the SQUIRE tool. Only 20% of studies provided sufficient detail to enable replication, and just 25% reported the theories or mechanisms underlying changes in AM use. Public health research documentation is often inadequate, and it is not uncommon for AMR intervention studies to lack su…	January 2019	High 11/12	22/66	66/66
Scoping Review	Summarize evidence on the implementation and outcomes of pediatric ASPs worldwide (14).	Strategies: Strengthen adherence to ASP recommendations among healthcare personnel using implementation strategies.	November 21, 2018	Critically low 6/10	2/113	113/113
Systematic review	Conduct an inventory of interventions that may be considered part of ASPs (53).	Barriers: The implementation of ASPs can be considered complex, particularly in smaller healthcare settings such as long-term care facilities, for several reasons: (1) AMR is not usually perceived as a major problem; (2) there is a scarcity of well-validated strategies for these settings; (3) there is a lack of funding and resources; and (4) there is a high prevalence of diagnostic uncertainty.	June 18, 2018	Critically low 6/12	0/36	36/36
Systematic review	To analyze decisions related to AM prescription in hospitals worldwide (65).	Facilitators: The majority of healthcare professionals recognize the inappropriate use of AMs and the excessive reliance on broad-spectrum antibiotics as significant problems. They acknowledge the need for initiatives to rationalize AM use and modify prescribing behavior, which also provides additional benefits such as ensuring appropriate patient care, reducing costs, and shortening hospital sta…	January 2018	Critically low 5/12	0/34	34/34
Scoping review	Investigate the scope and characteristics of research activities aimed at improving antimicrobial (AM) stewardship among farmers and veterinarians involved in the health and welfare of food-producing animals (38).	Facilitators: Appropriate AM prescription: Epidemiology, disease outcomes in the livestock sector, agricultural factors, knowledge in the livestock and swine sectors, and responsibility in the production of food-producing animals. Prudent AM use: Implementation of good agricultural management practices; farmers’ knowledge influenced the swine and food production sectors, while in the livestock se…	November 2017	Moderate 7/10	1/52	52/52
Global action plan	Provide the necessary guidelines for the creation of a NAP from the One Health approach (66).	Strategies: Considerations for implementing National Action Plans (NAPs) according to the resources available in each country: (1) Improve awareness and understanding of AMR through effective communication, education, and training; (2) strengthen knowledge and the scientific evidence base through surveillance and research; (3) reduce the incidence of infections through effective sanitation, hygie…	2016	N/A	No information	No information
Narrative review	Evaluate the effectiveness of policies: responsible use of AM, surveillance and ICP programs at national and regional levels (67).	Barriers: (1) The effects of policies to combat AMR are variable, and the lack of progress is largely due to insufficient evidence to inform decision-makers about the effectiveness, generalizability, and cost-effectiveness of these initiatives; (2) policies that promote the responsible use of AM in primary and outpatient care are effective, but they are not easily generalizable; and (3) evidence …	2015	N/A	No information	No information
Systematic review and expert consensus	Develop a set of quality indicators for the appropriate measurement of AM use and AMR in the outpatient setting (68).	Barriers: Few unique quality indicators have been identified to measure AM use in the outpatient setting. Further research is needed to develop and validate new quality indicators, including some focused on diagnostic processes. Strategies: Quality indicators can be used to assess the appropriateness of current AM use at the individual, regional, or national level, enabling the identification of …	December 12, 2014	Critically low 6/12	0/61	61/61
Systematic review	To summarize the evidence on the use of data obtained from electronic prescription platforms and pharmacy dispensing records in the hospital setting. (69).	Barriers: There are difficulties in adequately extracting data from electronic databases, as the process is complex, time-consuming, and requires the support of information technology specialists. The quality and completeness of data in electronic systems are essential, requiring the commitment of AM prescribers and dispensers. However, this may encounter resistance due to workload burden, lack o…	August 15, 2014	Critically low 9/12	0/14	14/14

## Sheet: References
References
1. Wils J, Saegeman V, Schuermans A. Impact of multiplexed respiratory viral panels on infection control measures and antimicrobial stewardship: a review of the literature. Eur J Clin Microbiol Infect Dis. 2022;41(2):187-202.
2. Ababneh MA, Nasser SA, Rababa’h AM. A systematic review of Antimicrobial Stewardship Program implementation in Middle Eastern countries. Int J Infect Dis. 2021;105:746-52.
3. Okeah BO, Morrison V, Huws JC. Antimicrobial stewardship and infection prevention interventions targeting healthcare-associated Clostridioides difficile and carbapenem-resistant Klebsiella pneumoniae infections: a scoping review. BMJ Open. 2021;11(8):e051983. doi: 10.1136/bmjopen-2021-051983.
4. Monmaturapoj T, Scott J, Smith P, Abutheraa N, Watson MC. Pharmacist-led education-based antimicrobial stewardship interventions and their effect on antimicrobial use in hospital inpatients: a systematic review and narrative synthesis. J Hosp Infect. 2021;115:93-116.
5. Schuts EC, Boyd A, Muller AE, Mouton JW, Prins JM. The effect of antibiotic restriction programs on prevalence of antimicrobial resistance: A systematic review and meta-analysis. Open Forum Infect Dis. 2021;8(4):ofab070. doi: 10.1093/ofid/ofab070.
6. Oliveira I, Rego C, Semedo G, Gomes D, Figueiras A, Roque F, et al. Systematic review on the impact of guidelines adherence on antibiotic prescription in respiratory infections. Antibiotics (Basel). 2020;9(9): 546. doi: 10.3390/antibiotics9090546.
7. Thursky KA, Hardefeldt LY, Rajkhowa A, Ierano C, Bishop J, Hawes L, et al. Antimicrobial stewardship in Australia: the role of qualitative research in programme development. JAC Antimicrob Resist. 2021;3(4):dlab166. doi: 10.1093/jacamr/dlab166.
8. Johnson MD, Lewis RE, Dodds Ashley ES, Ostrosky-Zeichner L, Zaoutis T, Thompson GR, et al. Core recommendations for antifungal stewardship: a statement of the mycoses study group education and research consortium. J Infect Dis. 2020;222: (Suppl 3):S175-S198.
9. Evidence-informed Policy Network (EVIPNet) Europe - World Health Organization. Evidence brief for policy: Strengthening Romania’s health system to address antimicrobial resistance. Copenhagen: WHO Regional Office for Europe; 2020, Report No. 6. Available from: https://www.who.int/europe/publications/i/item/WHO-EURO-2020-5545-45310-64851. Accessed 24 Mar 2021.
10. El-Sokkary RH, Asaad AM. Hospital antibiotic stewardship interventions in low and middle income countries: A systematic review and meta-analysis. Microbes and Infectious Diseases. 2020;1(3):153-67.
11. Chetty S, Reddy M, Ramsamy Y, Naidoo A, Essack S. Antimicrobial stewardship in South Africa: a scoping review of the published literature. JAC Antimicrob Resist. 2019;1(3):dlz060. doi: 10.1093/jacamr/dlz060.
12. Helou RI, Foudraine DE, Catho G, Peyravi Latif A, Verkaik NJ, Verbon A. Use of stewardship smartphone applications by physicians and prescribing of antimicrobials in hospitals: A systematic review. PLoS ONE. 2020;15(9): e0239751. https://doi.org/10.1371/journal.pone.0239751
13. Cuevas C, Batura N, Wulandari LPL, Khan M, Wiseman V. Improving antibiotic use through behaviour change: A systematic review of interventions evaluated in low- And middle-income countries. Health Policy Plan. 2021;36(5):754-73.
14. Donà D, Barbieri E, Daverio M, Lundin R, Giaquinto C, Zaoutis T, et al. Implementation and impact of pediatric antimicrobial stewardship programs: a systematic scoping review. Antimicrob Resist Infect Control. 2020;9:3. doi.org/10.1186/s13756-019-0659-3.
15. Price L, MacDonald J, Melone L, Howe T, Flowers P, Currie K, et al. Effectiveness of national and subnational infection prevention and control interventions in high-income and upper-middle-income countries: a systematic review. Lancet Infect Dis. 2018;18(5):e159-71. doi: 10.1016/S1473-3099(17)30479-6
16. Araujo da Silva AR, Albernaz de Almeida Dias DC, Marques AF, Biscaia di Biase C, Murni IK, Dramowski A, et al. Role of antimicrobial stewardship programmes in children: a systematic review. J Hosp Infect. 2018;99(2):117-23.
17. Wilkinson A, Ebata A, Macgregor H. Interventions to reduce antibiotic prescribing in LMICs: A scoping review of evidence from human and animal health systems. Antibiotics. 2019;8(1):2. doi: 10.3390/antibiotics8010002.
18. Lee CF, Cowling BJ, Feng S, Aso H, Wu P, Fukuda K, et al. Impact of antibiotic stewardship programmes in Asia: a systematic review and meta-analysis. J Antimicrob Chemother. 2018;73(4):844-51.
19. Baur D, Gladstone BP, Burkert F, Carrara E, Foschi F, Döbele S, et al. Effect of antibiotic stewardship on the incidence of infection and colonisation with antibiotic-resistant bacteria and Clostridium difficile infection: a systematic review and meta-analysis. Lancet Infect Dis. 2017;17(9):990-1001.
20. Wilton P, Smith R, Coast J, Millar M. Strategies to contain the emergence of antimicrobial resistance: A systematic review of effectiveness and cost-effectiveness. J Health Serv Res Policy. 2002;7(2):111-7.
21. Reynolds M. A Systematic Review to Examine the Effectiveness of Antibiotic Educational Programs in Outpatient Settings at Reducing Antibiotic Prescribing? Masters Theses Diss Grad Res Major Pap Overv. 2020;366.
22. Aliyu S, Travers JL, Heimlich SL, Ifill J, Smaldone A. Antimicrobial Stewardship Interventions to Optimize Treatment of Infections in Nursing Home Residents: A Systematic Review and Meta-Analysis. J Appl Gerontol. 2022; 41(3):892-901.
23. Hemenway AN, DuBois DL. A Scoping Review of the Use of Social and Behavioral Change in Acute Care Antimicrobial Stewardship Initiatives. Hosp Pharm. 2022; 57(1):138-145.
24. Hegewisch-Taylor J, Dreser-Mansilla A, Romero-Mónico J, Levy-Hara G. Antimicrobial stewardship in hospitals in Latin America and the Caribbean: A scoping review. Rev Panam Salud Publica. 2020;44: e68. doi: 10.26633/RPSP.2020.68.
25. Hawes L, Buising K, Mazza D. Antimicrobial Stewardship in General Practice: A Scoping Review of the Component Parts. Antibiot (Basel). 2020;9(8):498. doi: 10.3390/antibiotics9080498.
26. Crayton E, Richardson M, Fuller C, Smith CM, Liu S, Forbes G, et al. Interventions to improve appropriate antibiotic prescribing in long-term care facilities: a systematic review. BMC Geriatr. 20(1):237. doi: 10.1186/s12877-020-01564-1.
27. Ayers J, Collins R, Bucheit JD. Antimicrobial Stewardship Efforts to Improve Management of Uncomplicated Urinary Tract Infections in the Ambulatory Care Setting: a Review. Curr Treat Options Infect Dis. 2018;10:291-301.
28. Löffler C, Böhmer F. The effect of interventions aiming to optimise the prescription of antibiotics in dental care — A systematic review. PLoS ONE. 2017;12(11): e0188061. doi: 10.1371/journal.pone.0188061.
29. Chua AQ, Verma M, Hsu LY, Legido-Quigley H. An analysis of national action plans on antimicrobial resistance in Southeast Asia using a governance framework approach. Lancet Reg Health West Pac. 2021;100084. doi: 10.1016/j.lanwpc.2020.100084.
30. Al Amin M, Hoque MN, Siddiki AZ, Saha S, Kamal MM. Antimicrobial resistance situation in animal health of Bangladesh. Vet World. 2020;13(12):2713-27.
31. Jani K, Srivastava V, Sharma P, Vir A, Sharma A, Vir A, Sharma A. Easy Access to Antibiotics; Spread of Antimicrobial Resistance and Implementation of One Health Approach in India. J Epidemiol Glob Health. 2021;11(4):444-452.
32. Compri M, Mader R, Mazzolini E, De-Angelis G, Mutters NT, Rajendran NB, et al. White paper: Bridging the gap between surveillance data and antimicrobial stewardship in the animal sector - Practical guidance from the JPIAMR ARCH and COMBACTE-MAGNET EPI-Net networks. J Antimicrob Chemother. 2020; 75(Suppl 2):ii52-ii66. doi: 10.1093/jac/dkaa429.
33. Hoque R, Ahmed SM, Naher N, Islam MA, Rousham EK, Islam BZ, Hassan S. Tackling antimicrobial resistance in Bangladesh: A scoping review of policy and practice in human, animal and environment sectors. PloS One. 2020;15(1):e0227947. doi: 10.1371/journal.pone.0227947.
34. Lhermie G, Verteramo Chiu L, Kaniyamattam K, Tauer LW, Scott HM, Gröhn YT. Antimicrobial Policies in United States Beef Production: Choosing the Right Instruments to Reduce Antimicrobial Use and Resistance Under Structural and Market Constraints. Front Vet Sci. 2019;6:245. doi: 10.3389/fvets.2019.00245.
35. Chambers JA, Crumlish M, Comerford DA, O’carroll RE. Antimicrobial resistance in humans and animals: Rapid review of psychological and behavioral determinants. Antibiotics (Basel). 2020; 9(6):285. doi: 10.3390/antibiotics9060285.
36. Anderson M, Schulze K, Cassini A, Plachouras D, Mossialos E. A governance framework for development and assessment of national action plans on antimicrobial resistance. Lancet Infect Dis. 2019;19(11):e371-84. doi: 10.1016/S1473-3099(19)30415-3.
37. Pezzani MD, Carrara E, Sibani M, Presterl E, Gastmeier P, Renk H, et al. White paper: Bridging the gap between human and animal surveillance data, antibiotic policy and stewardship in the hospital sector - Practical guidance from the JPIAMR ARCH and COMBACTE-MAGNET EPI-Net networks. J Antimicrob Chemother. 2020; 75(Suppl 2):ii20-ii32. doi: 10.1093/jac/dkaa426.
38. Gozdzielewska L, King C, Flowers P, Mellor D, Dunlop P, Price L. Scoping review of approaches for improving antimicrobial stewardship in livestock farmers and veterinarians. Prev Vet Med. 2020;180:105025. doi: 10.1016/j.prevetmed.2020.105025.
39. Sun R, Yao T, Zhou X, Harbarth S, Lin L. Non-biomedical factors affecting antibiotic use in the community: a mixed-methods systematic review and meta-analysis. Clin Microbiol Infect. 2022 ;28(3):345-54. doi: 10.1016/j.cmi.2021.10.017.
40. Van Katwyk SR, Grimshaw JM, Nkangu M, Nagi R, Mendelson M, Taljaard M, et al. Government policy interventions to reduce human antimicrobial use: A systematic review and evidence map. PLoS Med. 2019;16(6): e1002819. doi: 10.1371/journal.pmed.1002819.
41. Kivumbi MT, Standley CJ. Efforts to identify and combat antimicrobial resistance in uganda: A systematic review. Trop Med Infect Dis. 2021;6(2):86. doi: 10.3390/tropicalmed6020086.
42. Loftus M, Stewardson A, Naidu R, Coghlan B, Jenney A, Kepas J, et al. Antimicrobial resistance in the Pacific Island countries and territories. BMJ Glob Health. 2020; 5(4):e002418. doi: 10.1136/bmjgh-2020-002418.
43. Mugerwa I, SN N, Midega J, Guma C, Kalyesubula S, Muwonge A. Antimicrobial Resistance Situational Analysis 2019-2020: Design and Performance for Human Health Surveillance in Uganda. Trop Med Infect Dis. 2021;6(4):178. doi: 10.3390/tropicalmed6040178.
44. McClelland S, Lamoureux B, Larson E. Trends in antimicrobial resistance legislation 2011-2019: A review of the US policy response to the antimicrobial resistance threat and its public health Impact. Am J Infect Control. 2021;49(6):813-7.
45. Bennani H, Cornelsen L, KDC S, Häsler B. Characterisation and mapping of the surveillance system for antimicrobial resistance and antimicrobial use in the United Kingdom. Vet Rec. 2021;188(7):e10. doi: 10.1002/vetr.10.
46. Diallo OO, Baron SA, Abat C, Colson P, Chaudet H, Rolain JM. Antibiotic resistance surveillance systems: A review. J Glob Antimicrob Resist. 2020;23:430-8.
47. Nasr ZG, Abbara DM, Wilby KJ. A scoping review of antimicrobial stewardship teaching in pharmacy education curricula. Am J Pharm Educ. 2021;85(6):8415. doi: 10.5688/ajpe8415.
48. van Huizen P, Kuhn L, Russo PL, Connell CJ. The nurses’ role in antimicrobial stewardship: A scoping review. Int J Nurs Stud. 2021;113:103772. doi: 10.1016/j.ijnurstu.2020.103772.
49. Beck AP, Baubie K, Knobloch MJ, Safdar N. Promoting antimicrobial stewardship by incorporating it in undergraduate medical education curricula. WMJ. 2018;117(5):224-8.
50. Silverberg SL, Zannella VE, Countryman D, Ayala AP, Lenton E, Friesen F, et al. A review of antimicrobial stewardship training in medical education. Int J Med Educ. 2017;8:353-74.
51. Gotterson F, Buising K, Manias E. Nurse role and contribution to antimicrobial stewardship: An integrative review. Int J Nurs Stud. 2021;117:103787. doi: 10.1016/j.ijnurstu.2020.103787
52. Kyaw BM, Car LT, Galen LS van, van Agtmael MA, Costelloe CE, Ajuebor O, et al. Health professions digital education on antibiotic management: Systematic review and meta-analysis by the digital health education collaboration. J Med Internet Res. 2019;21(9): e14984. doi: 10.2196/14984.
53. Belan M, Thilly N, Pulcini C. Antimicrobial stewardship programmes in nursing homes: A systematic review and inventory of tools. J Antimicrob Chemother. 2020;75(6):1390-7.
54. Akhtar A, Khan AH, Fatima S, Hassali MA. Antimicrobial stewardship in residential aged care facilities: A Systematic Review. Biomed Res Ther. 2020;7(1):3550-62.
55. Saha SK, Hawes L, Mazza D. Effectiveness of interventions involving pharmacists on antibiotic prescribing by general practitioners: a systematic review and meta-analysis. J Antimicrob Chemother. 2019;74(5):1173-81.
56. Patel SJ, Larson EL, Kubin CJ, Saiman L. A review of antimicrobial control strategies in hospitalized and ambulatory pediatric populations. Pediatr Infect Dis J. 2007;26(6):531-7.
57. Cross ELA, Tolfree R, Kipping R. Systematic review of public-targeted communication interventions to improve antibiotic use. J Antimicrob Chemother. 2017;72(4):975-87.
58. Fletcher-Miles H, Gammon J, Williams S, Hunt J. A scoping review to assess the impact of public education campaigns to affect behavior change pertaining to antimicrobial resistance. Am J Infect Control. 2020;48(4):433-42.
59. Burstein VR, Trajano RP, Kravitz RL, Bell RA, Vora D, May LS. Communication interventions to promote the public’s awareness of antibiotics: A systematic review. BMC Public Health. 2019;19(1):899. doi: 10.1186/s12889-019-7258-3.
60. Contexto ganadero. Una lectura rura de la realidad Colombiana. Reportaje: Estamos a dos días de iniciarse RAM 2021. 2021. Available from: https://www.contextoganadero.com/reportaje/estamos-dos-dias-de-iniciarse-ram-2021-jose-de-silvestri. Accessed: 08 Feb 2021.
61. Porter GJ, Owens S, Breckons M. A systematic review of qualitative literature on antimicrobial stewardship in Sub-Saharan Africa. Glob Health Res Policy. 2021; 6(1):31. doi: 10.1186/s41256-021-00216-0.
62. Hashad N, Perumal D, Stewart D, Tonna A. Mapping hospital antimicrobial stewardship programmes in the Gulf Cooperation Council states against international standards: a systematic review. J Hosp Infect. 2020;106(3):404-18.
63. Kirchhelle C, Atkinson P, Broom A, Chuengsatiansup K, JP F, Fortané N, et al. Setting the standard: multidisciplinary hallmarks for structural, equitable and tracked antibiotic policy. BMJ Glob Health. 2020;5(9):e003091. doi: 10.1136/bmjgh-2020-003091.
64. Rogers Van Katwyk S, Grimshaw JM, Nkangu M, Mendelson M, Taljaard M, Hoffman SJ. Study reporting quality among interventions to reduce antibiotic use is a barrier to evidence-informed policymaking on antimicrobial resistance: Systematic review. J Antimicrob Chemother. 2020;75(5):1091-8.
65. Krockow EM, Colman AM, Chattoe-Brown E, Jenkins DR, Perera N, Mehtar S, et al. Balancing the risks to individual and society: a systematic review and synthesis of qualitative research on antibiotic prescribing behaviour in hospitals. J Hosp Infect. 2019;101(4):428-39.
66. World Health Organization. Global action plan on antimicrobial resistance. Geneva, Switzerland: World Health Organization; 2016. Available from: https://iris.who.int/server/api/core/bitstreams/1a487887-e162-46a0-8aef-802907c66070/content. Accessed 25 Mar 2021.
67. Dar OA, Hasan R, Schlundt J, Harbarth S, Caleo G, Dar FK, et al. Exploring the evidence base for national and regional policy interventions to combat resistance. The Lancet. 2016;387(10015):285-95.
68. Le Maréchal M, Tebano G, Monnier AA, Adriaenssens N, Gyssens IC, Huttner B, et al. Quality indicators assessing antibiotic use in the outpatient setting: A systematic review followed by an international multidisciplinary consensus procedure. J Antimicrob Chemother. 2018; 73(Suppl 6):vi40-vi9. doi: 10.1093/jac/dky117. PMID: 29878218.
69. Micallef C, Chaudhry NT, Holmes AH, Hopkins S, Benn J, Franklin BD. Secondary use of data from hospital electronic prescribing and pharmacy systems to support the quality and safety of antimicrobial use: A systematic review. J Antimicrob Chemother. 2017;72(7):1880-5.
